# Supplementary material for: Chitosan/Polyvinyl Alcohol/Tea Tree Essential Oil Composite Films for Biomedical Applications
Source: MDPI journal article supplement (doi:10.3390/polym13213753), 2021-10-29
Supplement: s1 [file s1]

# Chitosan/Polyvinyl alcohol/ Tea Tree Essential Oil composite films for Biomedical Applications

Jorge Iván Castro <sup>1</sup>, Carlos Humberto Valencia-Llano <sup>2</sup>, Mayra Eliana Valencia Zapata <sup>3</sup>, Yilmar Joan Restrepo <sup>3</sup>, José Herminul Mina Hernandez <sup>3</sup>, Diana Paola Navia-Porras <sup>4</sup>, Yamid Valencia <sup>5</sup>, Cesar Valencia <sup>5</sup> and Carlos David Grande-Tovar <sup>6,\*</sup>

<sup>1</sup> Grupo de Investigación SIMERQO, Departamento de Química, Universidad del Valle, Calle 13 No. 100-00, 76001 Cali, Colombia; jorge.castro@correounivalle.edu.co (J.I.C.);

<sup>2</sup> Grupo Biomateriales Dentales, Escuela de Odontología, Universidad del Valle, Calle 4B No. 36-00, 76001 Cali, Colombia; carlos.humberto.valencia@correounivalle.edu.co

<sup>3</sup> Grupo de Materiales Compuestos, Escuela de Ingeniería de Materiales, Facultad de Ingeniería, Universidad del Valle, Calle 13 No. 100-00, 760032 Santiago de Cali, Colombia; valencia.mayra@correounivalle.edu.co (M.E.V.Z.); yilmar.restrepo@correounivalle.edu.co; jose.mina@correounivalle.edu.co (J.H.M.H.).

<sup>4</sup> Grupo de Investigación Biotecnología, Facultad de Ingeniería, Universidad de San Buenaventura Cali, Carrera 122 # 6-65, Cali 76001, Colombia

<sup>5</sup> Área de Investigación, Desarrollo e Innovación, Disproquin S.A.S., Calle 93 Número 7u-2a, Vía Cali-Juanchito 760021, Colombia

<sup>6</sup> Grupo de Investigación de Fotoquímica y Fotobiología, Facultad de Ciencias, Universidad del Atlántico, Carrera 30 Número 8-49, 081008 Puerto Colombia, Colombia

\* Correspondence: carlosgrande@mail.uniatlantico.edu.co; Tel.: +57-53-599-484

## Supplementary Materials

**Table S1.** Volatile compounds expressed as area percentage identified in the *Melaleuca alternifolia* essential oil

|                           | Compound                     | RT    | Relative amount (%) |
|---------------------------|------------------------------|-------|---------------------|
| Monoterpenes hydrocarbons | $\alpha$ -Thujene            | 15.96 | 1.1                 |
|                           | $\alpha$ -Pinene             | 16.35 | 2.7                 |
|                           | Sabinene                     | 18.06 | 0.1                 |
|                           | $\beta$ -Pinene              | 18.33 | 0.8                 |
|                           | $\beta$ -Myrcene             | 18.72 | 0.8                 |
|                           | $\alpha$ -Phellandrene       | 19.54 | 0.5                 |
|                           | $\alpha$ -Terpinene          | 20.08 | 9.4                 |
|                           | <i>p</i> -Cymene             | 20.39 | 4.7                 |
|                           | Limonene                     | 20.57 | 1.0                 |
|                           | 1,8-cineole                  | 20.75 | 3.9                 |
|                           | $\gamma$ -Terpinene          | 21.91 | 18.4                |
| Monoterpenes oxygenated   | Terpinolene                  | 22.93 | 3.7                 |
|                           | <i>p</i> -Cymenene           | 23.09 | 0.1                 |
|                           | Linalool                     | 23.37 | 0.1                 |
|                           | <i>cis-p</i> -Ment-2-en-1-ol | 24.50 | 0.2                 |

|                              |                                                                          |       |      |
|------------------------------|--------------------------------------------------------------------------|-------|------|
|                              | <i>trans-p</i> -Ment-2-en-1-ol                                           | 25.34 | 0.1  |
|                              | Terpinene-4-ol                                                           | 27.09 | 35.5 |
|                              | $\alpha$ -Terpineol                                                      | 27.41 | 3.5  |
|                              | <i>Trans</i> -piperitol                                                  | 27.80 | 0.1  |
| Sesquiterpenes oxygenated    | A mixture of compounds                                                   | 29.53 | 0.1  |
|                              | C <sub>10</sub> H <sub>16</sub> O+C <sub>10</sub> H <sub>18</sub> O+N.I. |       |      |
|                              | A mixture of compounds <i>trans</i> -ascaridol                           | 30.19 | 0.1  |
|                              | glicol+C <sub>10</sub> H <sub>14</sub> O                                 |       |      |
|                              | N.I.                                                                     | 30.80 | 0.1  |
| Sesquiterpenes no oxygenated | C <sub>10</sub> H <sub>18</sub> O <sub>2</sub>                           | 31.83 | 0.1  |
|                              | $\alpha$ -cubebene                                                       | 32.81 | 0.1  |
|                              | Isodene                                                                  | 33.82 | 0.1  |
|                              | $\alpha$ -copaene                                                        | 34.02 | 0.2  |
|                              | $\alpha$ -gurjunene                                                      | 35.26 | 0.6  |
|                              | <i>trans</i> - $\beta$ -Caryophellene                                    | 35.75 | 0.6  |
|                              | C <sub>15</sub> H <sub>24</sub>                                          | 36.00 | 0.1  |
|                              | $\alpha$ -Maaliene                                                       | 36.29 | 0.1  |
|                              | Aromadendrene                                                            | 36.44 | 1.8  |
|                              | Seline-5,11-diene                                                        | 36.65 | 0.2  |
|                              | <i>Trans</i> -muurola-3,5-diene                                          | 36.74 | 0.2  |
|                              | $\alpha$ -humulene                                                       | 37.01 | 0.2  |
|                              | Aloaramadendrene                                                         | 37.18 | 0.7  |
|                              | <i>Trans</i> -cadine-1(6),4-diene                                        | 37.47 | 0.4  |
|                              | $\gamma$ -muurolene                                                      | 37.54 | 0.1  |
|                              | $\delta$ -selinene                                                       | 37.98 | 0.3  |
|                              | Viridiflorene                                                            | 38.17 | 1.5  |
|                              | Bicyclgermacrene                                                         | 38.32 | 0.7  |
|                              | $\delta$ -cadidine                                                       | 38.95 | 1.6  |
|                              | Mixture of compounds: <i>cis</i> -calamenene+zonarene                    | 39.13 | 0.7  |
|                              | <i>Trans</i> -cadine-1,4-diene                                           | 39.42 | 0.3  |
|                              | <i>epi</i> -globulol                                                     | 40.42 | 0.1  |
|                              | A mixture of compounds: Maaliol-Palustrol                                | 40.68 | 0.1  |
|                              | Espatulenol                                                              | 40.84 | 0.2  |
|                              | Globulol                                                                 | 41.14 | 0.5  |
|                              | Mixture of compounds:                                                    | 41.41 | 0.4  |

| Viridiflorol+cubeban-<br>11-ol    |       |     |
|-----------------------------------|-------|-----|
| Rosifoliol                        | 41.70 | 0.2 |
| C <sub>15</sub> H <sub>24</sub> O | 42.18 | 0.2 |
| 1- <i>epi</i> -cubenol            | 42.25 | 0.3 |
| Cis-cadin-4-en-7-ol               | 42.66 | 0.7 |

**Table S2.** Physical-chemical analysis of the emulsions before and after adding PVA

| Sample       | Solids (%) *              | pH*                       | Apparent<br>viscosity (cP)<br>(1/100) * | Density (g/mL) | Particle Size*            |                           | observation                |
|--------------|---------------------------|---------------------------|-----------------------------------------|----------------|---------------------------|---------------------------|----------------------------|
|              |                           |                           |                                         |                | D <sub>50</sub> (μm)      | D <sub>98</sub> (μm)      |                            |
| CS           | 1.65 <sup>b</sup> ± 0.018 | 2.76 <sup>a</sup> ± 0.004 | 35 <sup>a</sup>                         | 1.00           | N/A                       | N/A                       |                            |
| CS/TTEO 0.5% | 2.45 <sup>a</sup> ± 0.018 | 2.82 <sup>a</sup> ± 0.013 | 35 <sup>ab</sup> ± 0.023                | 1.00           | 0.78 <sup>a</sup> ± 0.004 | 1.56 <sup>a</sup> ± 0.004 |                            |
| CS/TTEO 1.0% | 2.10 <sup>a</sup> ± 0.060 | 2.81 <sup>a</sup> ± 0.004 | 35 <sup>ab</sup> ± 0.045                | 1.00           | 1.04 <sup>a</sup> ± 0.004 | 1.98 <sup>a</sup> ± 0.004 |                            |
| CS/TTEO 1.5% | 2.08 <sup>a</sup> ± 0.022 | 2.81 <sup>a</sup> ± 0.011 | 35 <sup>b</sup> ± 0.021                 | 1.00           | 1.01 <sup>a</sup> ± 0.007 | 1.99 <sup>a</sup> ± 0.004 |                            |
| CS           | 1.65 <sup>b</sup> ± 0.040 | 2.75 <sup>a</sup> ± 0.004 | 35 <sup>a</sup> ± 0.0032                | 1.00           | N/A                       | N/A                       | Measurement was            |
| CS/TTEO 0.5% | 2.43 <sup>a</sup> ± 0.022 | 2.81 <sup>a</sup> ± 0.007 | 35 <sup>ab</sup> ± 0.002                | 1.00           | 0.50 <sup>a</sup> ± 0.007 | 0.98 <sup>a</sup> ± 0.000 | performed after            |
| CS/TTEO 1.0% | 2.07 <sup>a</sup> ± 0.020 | 2.83 <sup>a</sup> ± 0.016 | 35 <sup>ab</sup> ± 0.005                | 1.00           | 0.69 <sup>a</sup> ± 0.007 | 1.22 <sup>a</sup> ± 0.011 | homogenization at 3000 psi |
| CS/TTEO 1.5% | 2.09 <sup>a</sup> ± 0.064 | 2.81 <sup>a</sup> ± 0.009 | 35 <sup>b</sup> ± 0.021                 | 1.00           | 0.89 <sup>a</sup> ± 0.011 | 1.62 <sup>a</sup> ± 0.018 | for 10 minutes.            |
| CS           | 1.66 <sup>b</sup> ± 0.03  | 7.43 <sup>a</sup> ± 0.009 | 106 <sup>a</sup> ± 0.0012               | 1.00           | N/A                       | N/A                       | Measurement performed      |
| CS/TTEO 0.5% | 2.46 <sup>a</sup> ± 0.04  | 7.44 <sup>a</sup> ± 0.007 | 74 <sup>ab</sup> ± 0.444                | 1.00           | 1.29 <sup>a</sup> ± 0.140 | 3.16 <sup>a</sup> ± 0.160 | after PVA addition to the  |
| CS/TTEO 1.0% | 2.05 <sup>a</sup> ± 0.01  | 7.44 <sup>a</sup> ± 0.009 | 66 <sup>ab</sup> ± 0.002                | 1.00           | 1.43 <sup>a</sup> ± 0.031 | 3.44 <sup>a</sup> ± 0.069 | CS/TTEO emulsion was       |
| CS/TTEO 1.5% | 2.10 <sup>a</sup> ± 0.06  | 4.55 <sup>a</sup> ± 0.013 | 28 <sup>b</sup> ± 0.444                 | 1.00           | 1.60 <sup>a</sup> ± 0.024 | 3.38 <sup>a</sup> ± 0.049 | added and homogenized      |
|              |                           |                           |                                         |                |                           |                           | again at 3000 psi for 10   |
|              |                           |                           |                                         |                |                           |                           | minutes.                   |
| CS           | 2.74 <sup>b</sup> ± 0.056 | 2.92 <sup>a</sup> ± 0.011 | 42 <sup>a</sup> ± 0.003                 | 1.00           | N/A                       | N/A                       | Measurement performed two  |
| CS/TTEO 0.5% | 4.00 <sup>a</sup> ± 0.064 | 2.95 <sup>a</sup> ± 0.004 | 43 <sup>ab</sup> ± 0.009                | 1.00           | 0.45 <sup>a</sup> ± 0.024 | 2.37 <sup>a</sup> ± 0.020 | years later without        |
| CS/TTEO 1.0% | 3.95 <sup>a</sup> ± 0.040 | 3.01 <sup>a</sup> ± 0.004 | 40 <sup>ab</sup> ± 0.012                | 1.00           | 0.32 <sup>a</sup> ± 0.018 | 0.82 <sup>a</sup> ± 0.018 | homogenization             |
| CS/TTEO 1.5% | 3.90 <sup>a</sup> ± 0.013 | 3.15 <sup>a</sup> ± 0.011 | 42 <sup>b</sup> ± 0.003                 | 1.00           | 0.52 <sup>a</sup> ± 0.004 | 1.42 <sup>a</sup> ± 0.018 |                            |

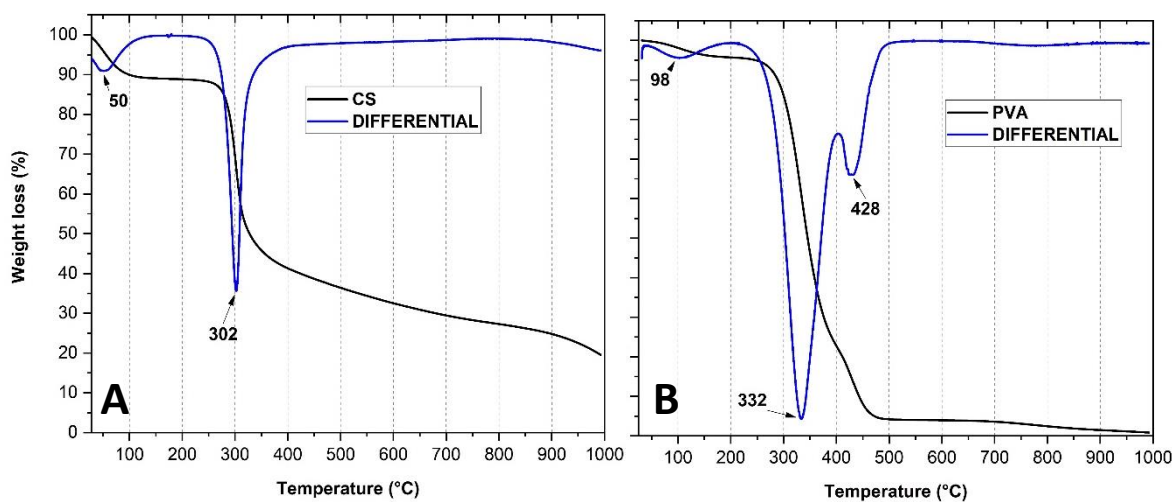

**Figure S1.** TGA and differential curves for CS and PVA
